# Supplementary material for: Nuciferine Inhibits Oral Squamous Cell Carcinoma Partially through Suppressing the STAT3 Signaling Pathway
Source: MDPI journal article supplement (doi:10.3390/ijms241914532), 2023-09-26
Supplement: s1 [file s1]

## Supplementary Material

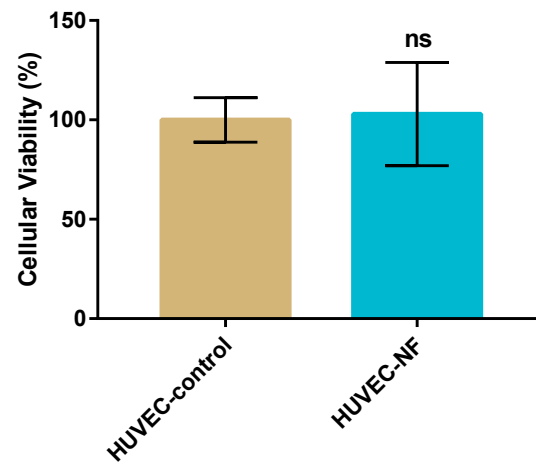

**Figure S1.** CCK8 assay was used to assess the effect of NF (100  $\mu$ M, 24 h) on HUVEC cell viability. NF, nuciferin. ns, no significance.

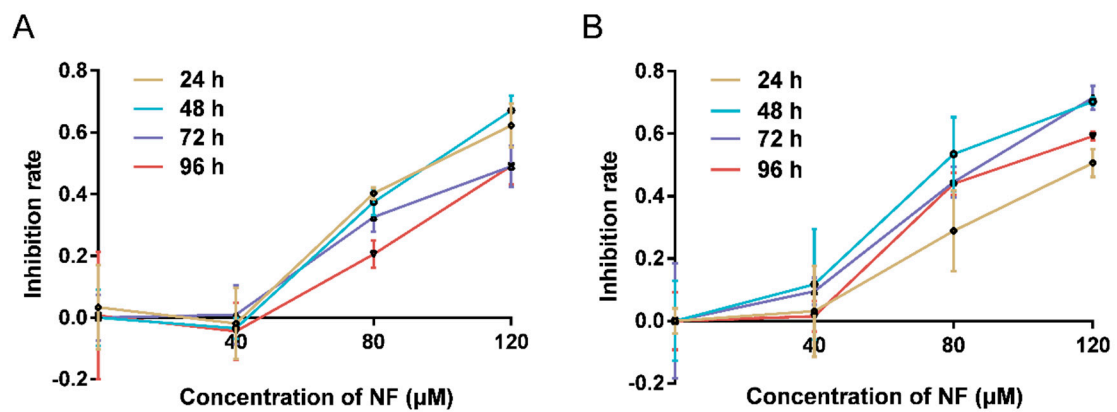

**Figure S2.** (A, B) CCK8 assay was used to assess inhibition rates in SCC25 and CAL27 cells treated with NF (0~120  $\mu$ M, 0~96 h). NF, nuciferin.
